# Supplementary material
Source: publisher site journal article supplement (https://www.dovepress.com/article/298233)
Supplement: Supplementary file 1 [file get_supplementary_file.php]

**Supplementary Table S1. Comparisons between elderly and older adults**

|  | Elderly, age ≥ 65  (N=63) | Older adults, age 50-65  (N=55) | *p* |
| --- | --- | --- | --- |
| Age | 68.43 ± 3.27 | 60.67 ± 3.00 | <0.001* |
| Sex (female) | 36 (57.1%) | 37 (67.3%) | 0.258 |
| Years of school education | 9.28 ± 4.49 | 10.95 ± 3.83 | 0.055 |
| MINI diagnosis of MDD: |  |  | 0.685 |
| Current MDD | 4 (6.3%) | 5 (9.1%) |  |
| Past MDD | 10 (15.9%) | 11 (20.0%) |  |
| Non-MDD | 49 (77.8%) | 39 (70.9%) |  |
| TDQ score: |  |  |  |
| TDQ total | 11.70 ± 10.47 | 12.67 ± 10.74 | 0.619 |
| TDQ ≥ 19 | 15 (23.8%) | 17 (30.9%) | 0.387 |
| AD8 score: |  |  |  |
| AD8 total | 1.79 ± 1.92 | 2.45 ± 2.42 | 0.107 |
| AD8 ≥ 2 | 30 (47.6%) | 23 (58.2%) | 0.252 |
| MMSE score | 27.56 ± 2.31 | 28.72 ± 1.33 | 0.001* |
| PSQI score | 7.96 ± 4.24 | 7.72 ± 3.86 | 0.768 |

A *p* < 0.05 was defined as statistical significance. Abbreviations: MINI, Mini-International Neuropsychiatric Interview. MDD, major depressive disorder. TDQ, Taiwanese Depression Questionnaire. MMSE, Mini-Mental State Examination. PSQI, Pittsburgh Sleep Quality Index.

**Supplement Table S2. Correlation analysis by Spearman’s rho statistics**

|  | | TDQ | Age | Education  year | Annual  income | AD8 | MMSE | PQSI | SF-36 | | | | | | | |
| --- | --- | --- | --- | --- | --- | --- | --- | --- | --- | --- | --- | --- | --- | --- | --- | --- |
| PF | RP | BP | GH | VT | SF | RE | MH |
| TDQ | | 1.000 |  |  |  |  |  |  |  |  |  |  |  |  |  |  |
| Age | | -.064 | 1.000 |  |  |  |  |  |  |  |  |  |  |  |  |  |
| Education year | | -.026 | -.273** | 1.000 |  |  |  |  |  |  |  |  |  |  |  |  |
| Annual income | | -.239* | .016 | .345** | 1.000 |  |  |  |  |  |  |  |  |  |  |  |
| AD8 | | .386** | -.124 | -.080 | -.066 | 1.000 |  |  |  |  |  |  |  |  |  |  |
| MMSE | | -.076 | -.324** | .443** | .109 | -.107 | 1.000 |  |  |  |  |  |  |  |  |  |
| PSQI | | .561** | .030 | .118 | -.134 | .391** | -.032 | 1.000 |  |  |  |  |  |  |  |  |
| SF-36 | PF | -.389** | .014 | .209 | .137 | -.321** | .172 | -.325** | 1.000 |  |  |  |  |  |  |  |
| RP | -.402** | .046 | .100 | .147 | -.385** | .047 | -.313** | .623** | 1.000 |  |  |  |  |  |  |
| BP | -.311** | -.082 | .103 | .038 | -.276** | .117 | -.297** | .550** | .575** | 1.000 |  |  |  |  |  |
| GH | -.546** | -.018 | .179 | .279** | -.335** | .216* | -.474** | .465** | .468** | .551** | 1.000 |  |  |  |  |
| VT | -.688** | -.013 | .093 | .124 | -.374** | .117 | -.482** | .490** | .424** | .365** | .585** | 1.000 |  |  |  |
| SF | -.413** | .155 | -.145 | -.020 | -.194** | -.054 | -.387** | .461** | .391** | .390** | .389** | .450** | 1.000 |  |  |
| RE | -.465** | .124 | .042 | -.014 | -.369** | .070 | -.384** | .394** | .539** | .271** | .334** | .425** | .292** | 1.000 |  |
| MH | -.603** | .133 | -.015 | .122 | -.391** | .020 | -.424** | .378** | .397** | .199** | .496** | .703** | .413** | .460** | 1.000 |

Correlations between variables were analyzed by Spearman's rank correlation coefficient (Spearman's rho, ρ). * Correlation was significant at 0.05 level (2-tailed). ** Correlation was significant at 0.01 level (2-tailed). TDQ, Taiwanese Depression Questionnaire. MMSE, Mini-mental state examination. PQSI, Pittsburgh Sleep Quality Index. SF-36, Short Form (36-item) Health Survey. PF, physical functioning. RP, physical role functioning. BP, body pain. GH, general health. VT, vitality. SF, social role functioning. RE, emotional role functioning. MH, mental health.

**Supplementary Figure S1. Youden’s J statistics to find cutoff of ROC curve**

The x-axis was the score of TDQ-AD8 combination. The y-axis was the Youden’s score. The point of the highest Youden’s score was the cutoff of prediction.
